# Supplementary material
Source: PubMed Central journal article supplement (PMC5738663)
Supplement: BPH-173-3372-s001.pdf [file BPH-173-3372-s001.pdf]

## Supplementary Methods

### Details of the three introduced parameters in bSDTNBI

To improve the method performance of the original SDTNBI (Wu *et al.*, 2016), bSDTNBI introduced three tunable parameters,  $\alpha \in [0,1)$ ,  $\beta \in [0,1)$ , and  $\gamma \in (-\infty, +\infty)$ , to its resource diffusion processes, described as below.

Firstly, in the initial resource allocation, for each drug, a total amount = 1 of initial resource was allocated to all its neighbor nodes. Specially, a total amount =  $\alpha$  of resource was equally allocated to its substructure nodes, and a total amount =  $1-\alpha$  of resource was equally allocated to its target nodes. In other words, for each drug,  $\alpha$  is the ratio of the amount of the resource located in its substructures to its total amount of resource (i.e. 1). Hence, by varying the value of parameter  $\alpha$  from 0 to 1, we can search which type of nodes (target or substructure nodes) will occupy the dominant position in the initial resource allocation (**Figure 1B**).

Secondly, in the substructure-drug-target network, the weighted values of all drug-substructure associations were set to  $\beta$ , and the weighted values of all DTIs were set to  $1-\beta$ . Hence, by varying the value of parameter  $\beta$  from 0 to 1, we can search which type of edges (DTIs or drug-substructure associations) will occupy the dominant position in the resource diffusion processes (**Figure 1C**).

Thirdly, another parameter  $\gamma$  was introduced to adjust the influence of hub nodes, namely those nodes connected with a large number of neighbor nodes. In current bSDTNBI, a positive value of  $\gamma$  will strengthen the influence of hub nodes, while a negative value of  $\gamma$  will weaken the influence of hub nodes, similar to what described in our previously developed NWNBI method (Cheng *et al.*, 2012).

Moreover, considering that new chemical entities can be labeled as special drugs without known targets, for each new chemical entity, a total amount =  $\alpha$  of initial resource was equally allocated to its substructure nodes in the initial resource allocation, and the weighted values of all its new chemical entity-substructure

associations were set to  $\beta$ .

### Details of the resource diffusion processes in bSDTNBI

Denoting the set of new chemical entities as  $C = \{C_1, C_2, \dots, C_{N_C}\}$ , the set of known drugs as  $D = \{D_1, D_2, \dots, D_{N_D}\}$ , the set of chemical substructures as  $S = \{S_1, S_2, \dots, S_{N_S}\}$ , and the set of target proteins as  $T = \{T_1, T_2, \dots, T_{N_T}\}$ , the substructure-drug (and new chemical entity)-target network can be represented as a graph  $G(V, E)$ , where  $V = C \cup D \cup S \cup T$  is the vertex set which contains four types of nodes (i.e. new chemical entities, drugs, substructures, and targets), and  $E$  is the edge set which contains three types of edges (i.e. new chemical entity-substructure associations, drug-substructure associations, and DTIs).

Mathematically, let  $M_{CS}$  and  $A_{CS}$  be three  $N_C \times N_S$  matrices, let  $M_{DS}$  and  $A_{DS}$  be two  $N_D \times N_S$  matrices, and let  $M_{DT}$  and  $A_{DT}$  be two  $N_D \times N_T$  matrices, respectively defined as:

$$M_{CS}(i, j) = \begin{cases} 1 & \text{if } C_i \text{ is linked with } S_j \\ 0 & \text{otherwise} \end{cases} \quad (1)$$

$$M_{DS}(i, j) = \begin{cases} 1 & \text{if } D_i \text{ is linked with } S_j \\ 0 & \text{otherwise} \end{cases} \quad (2)$$

$$M_{DT}(i, j) = \begin{cases} 1 & \text{if } D_i \text{ is linked with } T_j \\ 0 & \text{otherwise} \end{cases} \quad (3)$$

$$A_{CS}(i, j) = \alpha \cdot \frac{M_{CS}(i, j)}{\sum_{l=1}^{N_S} M_{CS}(i, l)} \quad (4)$$

$$A_{DS}(i, j) = \alpha \cdot \frac{M_{DS}(i, j)}{\sum_{l=1}^{N_S} M_{DS}(i, l)} \quad (5)$$

$$A_{DT}(i, j) = (1 - \alpha) \cdot \frac{M_{DT}(i, j)}{\sum_{l=1}^{N_T} M_{DT}(i, l)} \quad (6)$$

The initial resource matrix  $A$  of graph  $G$  can be represented as:

$$A = \begin{bmatrix} O & O & A_{CS} & O \\ O & O & A_{DS} & A_{DT} \\ A_{CS}^T & A_{DS}^T & O & O \\ O & A_{DT}^T & O & O \end{bmatrix} \quad (7)$$

Let B, C, and W be three  $(N_D+N_S+N_T)$  order square matrices, respectively defined as:

$$B = \begin{bmatrix} O & O & O & O \\ O & O & A_{DS} & A_{DT} \\ O & A_{DS}^T & O & O \\ O & A_{DT}^T & O & O \end{bmatrix} \quad (8)$$

$$C(i, j) = B(i, j) \cdot \left[ \sum_{l=1}^{N_C+N_D+N_S+N_T} B(l, j) \right]^\gamma \quad (9)$$

$$W(i, j) = \begin{cases} \frac{C(i, j)}{\sum_{l=1}^{N_C+N_D+N_S+N_T} C(i, l)} & \text{if } \sum_{l=1}^{N_C+N_D+N_S+N_T} C(i, l) \neq 0 \\ 0 & \text{otherwise} \end{cases} \quad (10)$$

The final resource matrix F can be calculated via following equation:

$$F = A \times W^k \quad (11)$$

Where  $W^k$  is the transfer matrix, k is the number of resource spreading processes. The value of  $F'(i, N_C+N_D+N_S+j)$  ( $0 < i \leq N_C, 0 < j \leq N_T$ ) is the score of the interaction between new chemical entity  $C_i$  and target  $T_j$ . The value of  $F(N_C+i, N_C+N_D+N_S+j)$  ( $N_C < i \leq N_C+N_D, 0 < j \leq N_T$ ) is the score of the interaction between drug  $D_i$  and target  $T_j$ .

## References

Cheng FX, Zhou YD, Li WH, Liu GX, Tang Y (2012). Prediction of chemical-protein interactions network with weighted network-based inference method. *PLoS One* 7(7): e41064.

Wu ZR, Cheng FX, Li J, Li WH, Liu GX, Tang Y (2016). SDTNBI: an integrated network and chemoinformatics tool for systematic prediction of drug-target interactions and drug repositioning. *Brief. Bioinform.* 10.1093/bib/bbw012.

## Supplementary Figures

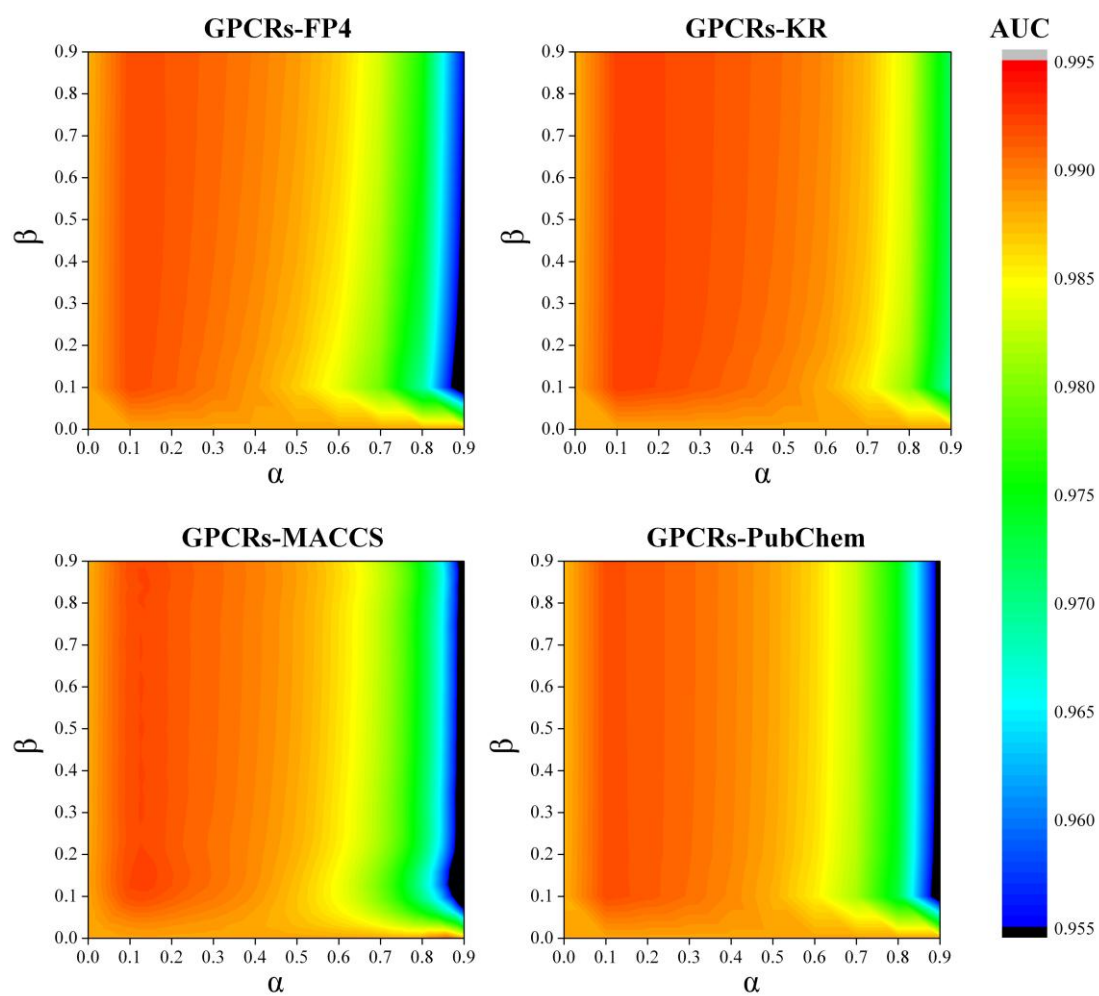

**Figure S1.** The relationship among two parameters  $\alpha$ ,  $\beta$ , and the average AUC value for the models of GPCRs in 10-fold cross validation.

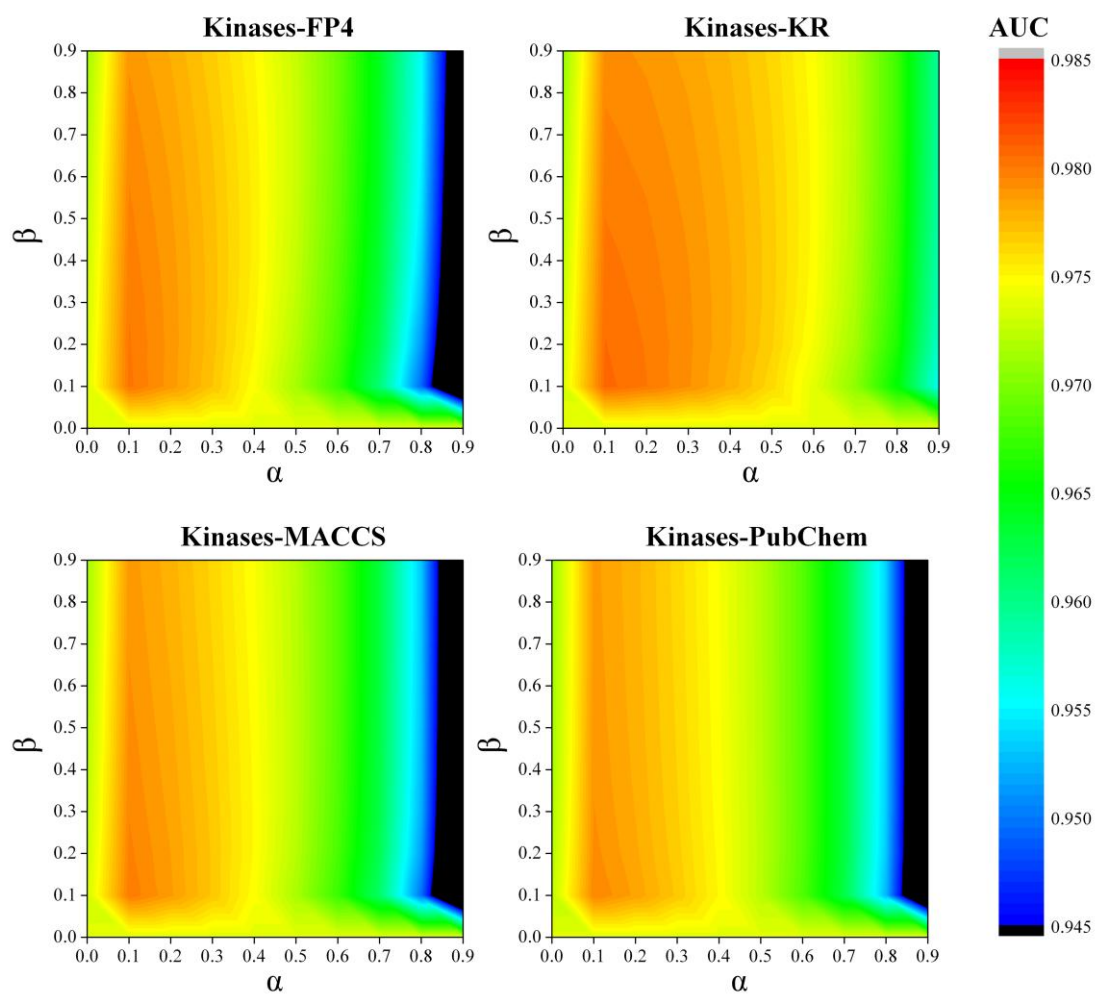

**Figure S2.** The relationship among two parameters  $\alpha$ ,  $\beta$ , and the average AUC value for the models of Kinases in 10-fold cross validation.

## Supplementary Tables

**Table S1.** The statistics of drug-substructure networks.

| Target  | FP      | N <sub>D</sub> | N <sub>S</sub> | N <sub>DS</sub> | Sparisty (%) |
|---------|---------|----------------|----------------|-----------------|--------------|
| GPCRs   | FP4     | 4,741          | 131            | 74,753          | 12.0         |
|         | KR      | 4,741          | 1,834          | 299,751         | 3.4          |
|         | MACCS   | 4,741          | 153            | 250,631         | 34.6         |
|         | PubChem | 4,741          | 627            | 742,237         | 25.0         |
| Kinases | FP4     | 2,827          | 122            | 44,290          | 12.8         |
|         | KR      | 2,827          | 1,618          | 129,906         | 2.8          |
|         | MACCS   | 2,827          | 149            | 148,122         | 35.2         |
|         | PubChem | 2,827          | 614            | 523,019         | 30.1         |
| Global  | FP4     | 1,872          | 148            | 26,714          | 9.6          |
|         | KR      | 1,872          | 1,959          | 93,738          | 2.6          |
|         | MACCS   | 1,872          | 153            | 86,446          | 30.2         |
|         | PubChem | 1,872          | 632            | 257,332         | 21.8         |

FP: the fingerprint type used to generate drug-substructure associations, N<sub>D</sub>: the number of drugs, N<sub>S</sub>: the number of substructures, N<sub>DS</sub>: the number of drug-substructure associations, Sparisty: the ratio of N<sub>DS</sub> to the number of all possible drug-substructure associations.

**Table S2.** The *in vitro* bioassay results of newly predicted ligands for estrogen receptor  $\alpha$ .

| Compound  | Structure                                                                           | Rank | EC <sub>50</sub><br>( $\mu$ M) | IC <sub>50</sub><br>( $\mu$ M) |
|-----------|-------------------------------------------------------------------------------------|------|--------------------------------|--------------------------------|
| Z18499127 | 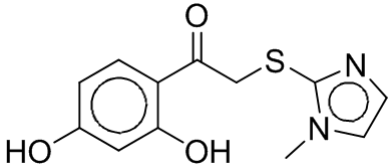   | 1    |                                |                                |
| Z92457891 |    | 1    | 0.33                           | 1.07                           |
| Z25218907 |   | 1    |                                | 8.51                           |
| Z25218929 |  | 1    |                                | 1.28                           |
| Z25219066 |  | 1    |                                | 0.37                           |
| Z54500757 |  | 1    |                                |                                |
| Z54108926 |  | 1    |                                |                                |

|            |                                                                                     |   |      |     |
|------------|-------------------------------------------------------------------------------------|---|------|-----|
| Z54118142  | 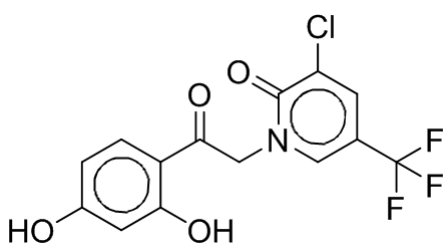   | 1 |      |     |
| Z54109200  |    | 1 | 6.17 |     |
| Z25218796  |   | 1 |      |     |
| Z46032404  |   | 1 | 0.58 |     |
| Z25218942  |  | 1 | 0.89 |     |
| Z46054228  |  | 1 |      |     |
| Z991569394 |  | 1 | 0.97 | 0.2 |
| Z56868143  |  | 1 | 6.16 |     |



|           |                                                                                     |   |          |
|-----------|-------------------------------------------------------------------------------------|---|----------|
| Z46032353 | 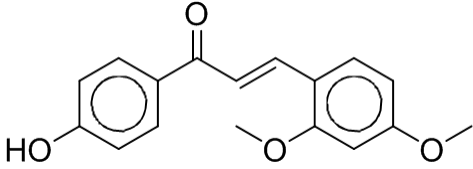   | 2 | 8.22     |
| Z25218345 |    | 2 | 0.74     |
| Z25219162 |    | 2 | 1.83     |
| Z73537237 |    | 2 |          |
| Z95162908 |  | 2 | 7.08     |
| Z56797264 |  | 3 | 0.99 3.8 |
| Z49614108 |  | 3 |          |
| Z56802474 |  | 3 | 1.35     |

|            |                                                                                     |   |      |
|------------|-------------------------------------------------------------------------------------|---|------|
| Z196385664 | 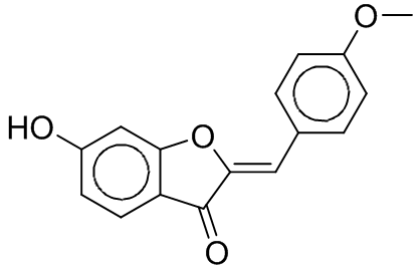   | 3 |      |
| Z55027883  |    | 3 | 1.03 |
| Z57122452  |    | 3 |      |
| Z44301033  |   | 3 |      |
| Z57301171  |  | 4 |      |
| Z46032399  |  | 4 | 1.11 |
| Z46628474  |  | 4 | 3.68 |
| Z19674177  |  | 4 | 3.71 |

|            |                                                                                     |   |      |
|------------|-------------------------------------------------------------------------------------|---|------|
| Z19675184  | 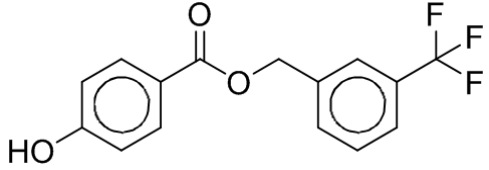   | 4 | 0.8  |
| Z286056758 |    | 4 | 4.25 |
| Z19674828  |    | 5 | 1.32 |
| Z19674832  |    | 5 | 0.2  |
| Z56620690  |   | 5 |      |
| Z46628031  |  | 5 | 2.99 |
| Z57086658  |  | 5 |      |
| Z19674036  |  | 5 | 11.6 |
| Z289012744 |  | 5 |      |

|            |                                                                                      |   |      |      |
|------------|--------------------------------------------------------------------------------------|---|------|------|
| Z196385666 | 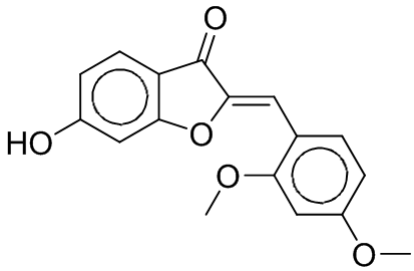    | 6 |      |      |
| Z19674818  |     | 6 | 0.79 | 0.26 |
| Z119968796 |     | 6 |      |      |
| Z46628065  |    | 6 |      |      |
| Z27717114  |   | 6 |      |      |
| Z73353399  |   | 7 |      |      |
| Z19674200  |  | 7 |      |      |
| Z19697221  |  | 9 |      |      |

|            |                                                                                     |    |      |      |
|------------|-------------------------------------------------------------------------------------|----|------|------|
| Z56620660  | 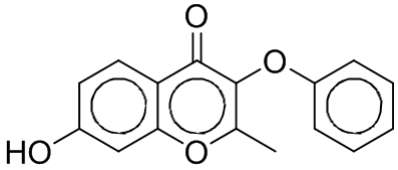   | 10 |      |      |
| Z242524208 |    | 10 |      |      |
| Z30422080  |    | 11 |      |      |
| Z19697324  |   | 13 | 2.05 |      |
| Z27715966  |  | 14 |      |      |
| Z19696562  |  | 15 | 42.9 |      |
| Z609086264 |  | 16 | 20.6 | 12.3 |
| Z19697748  |  | 20 | 0.96 |      |

---

---

|           |                                                                                                                                                       |         |
|-----------|-------------------------------------------------------------------------------------------------------------------------------------------------------|---------|
| Estradiol | 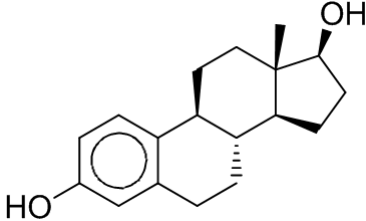<br><chem>OCC12CC[C@@]1(O)CCC3=C2C=CC(=C3)O</chem>                   | 0.00024 |
| Tamoxifen | <br><chem>CC(=C(C1=CC=CC=C1)C2=CC=CC=C2)C3=CC=C(C=C3)OCCN(C)C</chem> | 3.34    |

---

The compound identifiers are from the Enamine database, except two control compounds (i.e. Estradiol and Tamoxifen). Rank is the position of estrogen receptor  $\alpha$  in the predicted target list for the corresponding compound.
